# Supplementary material for: An unexpected large capacity of ultrafine manganese oxide as a sodium-ion battery anode
Source: Royal Society of Chemistry journal article supplement (doi:10.1039/c5nr07100c), 2015-01-01
Supplement: c5nr07100c1.pdf [file c5nr07100c1.pdf]

## Supplementary information

### Unexpected Large Capacity of Ultrafine Manganese Oxide as Sodium-Ion Battery Anode

Yu-Ting Weng,<sup>a</sup> Tzu-Yang Huang,<sup>a</sup> Chek-Hai Lim,<sup>a</sup> Pei-Sian Shao,<sup>a</sup> Sunny Hy,<sup>b</sup> Chao-Yen Kuo,<sup>b</sup> Ju-Hsiang Cheng,<sup>b</sup> Bing-Joe Hwang,<sup>b</sup> Jyh-Fu Lee<sup>c</sup> and Nae-Lih Wu<sup>\*a</sup>

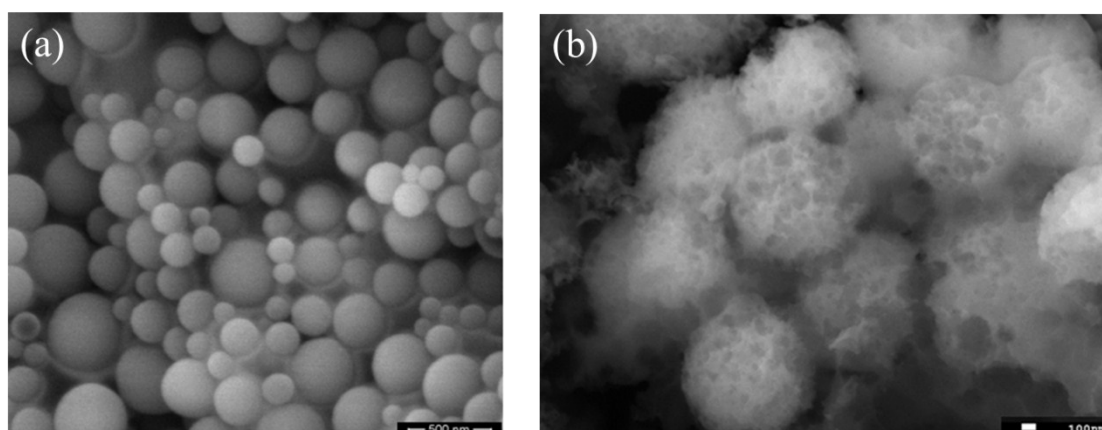

Figure S1. Low magnification micrographs of (a) the SiO<sub>2</sub> template particle; (b) MnO<sub>2</sub>/SiO<sub>2</sub> composite particles after etching.

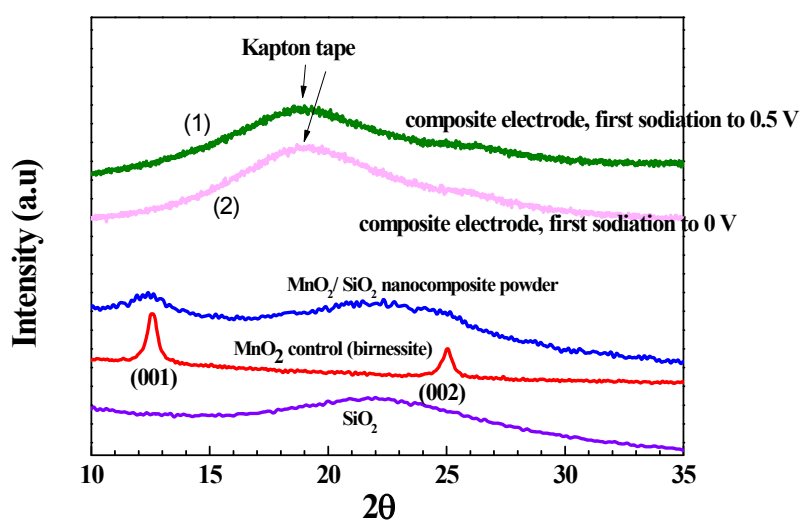

Figure S2. Ex-situ XRD study on electrodes discharged to potentials below 1.0 V (curves 1 and 2) shows no crystalline reflection, indicating that birnessite turned into amorphous MnO<sub>2</sub>.

amorphous phases upon the first sodiation cycle.
